# Supplementary material
Source: MDPI journal article supplement (https://www.mdpi.com/2073-445X/12/4/926)
Supplement: s1 [file s1]

## Supplementary Materials

**Table S1.** Mean field size [min:max], soil quality score (SQR), tillage regime and main crops cultivated on the 7 studied farms.

|         | Mean field size (ha)<br>[min:max] ha | SQR   | Soil fertility    | Tillage                 | Main crops                            |
|---------|--------------------------------------|-------|-------------------|-------------------------|---------------------------------------|
| Farm 1  | 31 [1.1:104]                         | 18–48 | poor to moderate  | low-tillage             | cereals, maize, rape seed, sugar beet |
| Farm 2* | 11 [0.2:54]                          | 26–35 | poor              | low-tillage             | cereals, maize, rape seed             |
| Farm 3  | 32 [0.1:149]                         | 65–90 | high to very high | low-tillage             | cereals, potato, maize                |
| Farm 4  | 7 [0.2:18]                           | 26–35 | poor              | <i>rotational till.</i> | cereals, potato, sugar beet           |
| Farm 5* | 3 [0.1:9.6]                          | 36–65 | poor to high      | conventional            | cereals, maize                        |
| Farm 6* | 5 [0.1:18.4]                         | 35–72 | poor to high      | conventional            | cereals, sugar beet                   |
| Farm 7* | 5 [1.2:10.8]                         | 23–70 | poor to high      | conventional            | cereals, maize                        |

\* fertilization: additionally, fermentation residues from biogas plants and manure

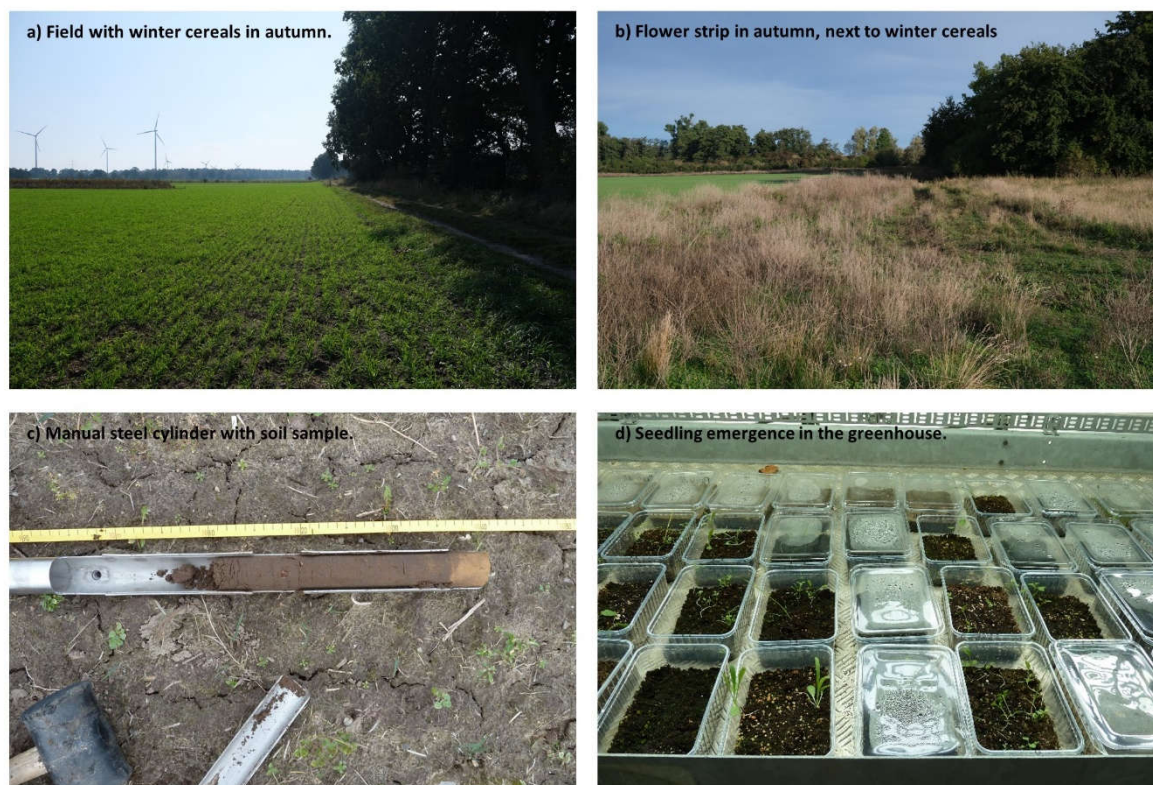

**Figure S1:** Soil seed bank sampling; (a) field edge with winter cereals, (b) flower strip in autumn, (c) soil sampling and d) seedling emergence in the greenhouse.

**Table S2:** Species list for distance classes (alphabetically ordered), mean values for species and seed [mean  $\pm$  sd] and total number of seedlings per species.

|                                | total       | %   | 0 m           | 0.5 m       | 1 m           | 2 m           | 3 m           | 4 m           | 5 m         |
|--------------------------------|-------------|-----|---------------|-------------|---------------|---------------|---------------|---------------|-------------|
| <b>Species/groups</b>          | <b>58</b>   |     | 7.6 $\pm$ 3.2 | 7.9 $\pm$ 2 | 5.8 $\pm$ 2.5 | 4.3 $\pm$ 2.4 | 4.7 $\pm$ 2.4 | 3.9 $\pm$ 2.3 | 3 $\pm$ 1.9 |
| <b>Seedlings</b>               | <b>1261</b> |     | 38 $\pm$ 24   | 56 $\pm$ 74 | 24 $\pm$ 18   | 10 $\pm$ 5    | 11 $\pm$ 8    | 13 $\pm$ 12   | 6 $\pm$ 5   |
| "Chamomilla"                   | 99          | 7.9 | 18            | 24          | 33            | 11            | 5             | 3             | 5           |
| "Grasses unidentified"         | 7           | 0.6 | 0             | 2           | 3             | 0             | 0             | 2             | 0           |
| "Forbs unidentified"           | 1           | 0.1 | 1             | 0           | 0             | 0             | 0             | 0             | 0           |
| <i>Achillea millefolium</i>    | 7           | 0.6 | 3             | 1           | 2             | 0             | 1             | 0             | 0           |
| <i>Aethusa cynopium</i>        | 34          | 2.7 | 2             | 11          | 7             | 7             | 5             | 2             | 0           |
| <i>Agrostis stolonifera</i>    | 1           | 0.1 | 0             | 0           | 0             | 0             | 0             | 1             | 0           |
| <i>Alopecurus myosuroides</i>  | 15          | 1.2 | 2             | 3           | 3             | 0             | 0             | 5             | 2           |
| <i>Amaranthus</i> spp.         | 64          | 5.1 | 1             | 42          | 19            | 0             | 0             | 0             | 2           |
| <i>Anagalis arvensis</i>       | 1           | 0.1 | 0             | 0           | 0             | 0             | 1             | 0             | 0           |
| <i>Anthriscus sylvestris</i>   | 2           | 0.2 | 2             | 0           | 0             | 0             | 0             | 0             | 0           |
| <i>Apera spica-venti</i>       | 4           | 0.3 | 0             | 3           | 0             | 0             | 0             | 1             | 0           |
| <i>Aphanes arvensis</i>        | 1           | 0.1 | 1             | 0           | 0             | 0             | 0             | 0             | 0           |
| <i>Arabidopsis thaliana</i>    | 17          | 1.3 | 9             | 1           | 4             | 2             | 1             | 0             | 0           |
| <i>Artemisia vulgaris</i>      | 1           | 0.1 | 0             | 0           | 0             | 0             | 0             | 1             | 0           |
| <i>Brassica napus</i>          | 2           | 0.2 | 0             | 1           | 0             | 0             | 0             | 1             | 0           |
| <i>Capsella bursa-pastoris</i> | 28          | 2.2 | 10            | 3           | 3             | 1             | 1             | 6             | 4           |
| <i>Centaurea cyanus</i>        | 3           | 0.2 | 0             | 0           | 0             | 1             | 1             | 1             | 0           |
| <i>Chenopodium album</i>       | 479         | 38  | 96            | 234         | 56            | 18            | 22            | 39            | 14          |
| <i>Conyza canadensis</i>       | 6           | 0.5 | 2             | 2           | 0             | 0             | 2             | 0             | 0           |
| <i>Crepis biennis</i>          | 1           | 0.1 | 0             | 1           | 0             | 0             | 0             | 0             | 0           |
| <i>Descuriana sophia</i>       | 42          | 3.3 | 0             | 1           | 2             | 5             | 20            | 11            | 3           |
| <i>Echinochloa crus-galli</i>  | 3           | 0.2 | 0             | 0           | 0             | 0             | 1             | 1             | 1           |
| <i>Epilobium</i> spp.          | 1           | 0.1 | 0             | 0           | 0             | 0             | 0             | 1             | 0           |
| <i>Erigeron annua</i>          | 1           | 0.1 | 0             | 0           | 1             | 0             | 0             | 0             | 0           |

To be continued on next page

|                               | total | %    | 0 m | 0.5 m | 1 m | 2 m | 3 m | 4 m | 5 m |
|-------------------------------|-------|------|-----|-------|-----|-----|-----|-----|-----|
| <i>Euphorbia spp.</i>         | 1     | 0.1  | 0   | 0     | 0   | 1   | 0   | 0   | 0   |
| <i>Fallopia convolvulus</i>   | 3     | 0.2  | 0   | 2     | 0   | 1   | 0   | 0   | 0   |
| <i>Festuca ovina</i>          | 1     | 0.1  | 0   | 1     | 0   | 0   | 0   | 0   | 0   |
| <i>Galium aparine</i>         | 2     | 0.2  | 0   | 0     | 2   | 0   | 0   | 0   | 0   |
| <i>Geranium pusillum</i>      | 5     | 0.4  | 4   | 1     | 0   | 0   | 0   | 0   | 0   |
| <i>Geranium spp.</i>          | 1     | 0.1  | 1   | 0     | 0   | 0   | 0   | 0   | 0   |
| <i>Holcus lanatus</i>         | 1     | 0.1  | 0   | 0     | 1   | 0   | 0   | 0   | 0   |
| <i>Juncus spp.</i>            | 13    | 1    | 2   | 0     | 1   | 2   | 1   | 2   | 5   |
| <i>Lactuca serriola</i>       | 19    | 1.5  | 2   | 1     | 3   | 2   | 1   | 9   | 1   |
| <i>Lamium amplexicaule</i>    | 3     | 0.2  | 1   | 2     | 0   | 0   | 0   | 0   | 0   |
| <i>Lamium purpureum</i>       | 11    | 0.9  | 6   | 3     | 1   | 0   | 1   | 0   | 0   |
| <i>Linaria vulgaris</i>       | 1     | 0.1  | 1   | 0     | 0   | 0   | 0   | 0   | 0   |
| <i>Mercurialis annua</i>      | 2     | 0.2  | 0   | 0     | 1   | 0   | 0   | 0   | 1   |
| <i>Myosotis arvensis</i>      | 2     | 0.2  | 0   | 0     | 1   | 0   | 1   | 0   | 0   |
| <i>Papaver spp.</i>           | 46    | 3.6  | 15  | 11    | 5   | 4   | 7   | 3   | 1   |
| <i>Plantago lanceolata</i>    | 48    | 3.8  | 17  | 22    | 4   | 3   | 2   | 0   | 0   |
| <i>Plantago major</i>         | 6     | 0.5  | 0   | 1     | 1   | 3   | 1   | 0   | 0   |
| <i>Poa pratensis</i>          | 3     | 0.2  | 1   | 0     | 0   | 2   | 0   | 0   | 0   |
| <i>Poa trivialis</i>          | 18    | 1.4  | 6   | 7     | 1   | 0   | 0   | 1   | 3   |
| <i>Polygonum aviculare</i>    | 28    | 2.2  | 12  | 6     | 7   | 1   | 1   | 0   | 1   |
| <i>Rumex crispus</i>          | 7     | 0.6  | 6   | 1     | 0   | 0   | 0   | 0   | 0   |
| <i>Rumex crispus</i>          | 6     | 0.5  | 5   | 1     | 0   | 0   | 0   | 0   | 0   |
| <i>Sagina procumbens</i>      | 1     | 0.1  | 0   | 0     | 0   | 0   | 1   | 0   | 0   |
| <i>Sisymbrium officinalis</i> | 4     | 0.3  | 2   | 0     | 1   | 1   | 0   | 0   | 0   |
| <i>Solanum nigrum</i>         | 2     | 0.2  | 1   | 0     | 0   | 0   | 1   | 0   | 0   |
| <i>Solidago spp.</i>          | 2     | 0.2  | 1   | 1     | 0   | 0   | 0   | 0   | 0   |
| <i>Sonchus arvensis</i>       | 5     | 0.4  | 0   | 2     | 2   | 1   | 0   | 0   | 0   |
| <i>Sonchus asper</i>          | 3     | 0.2  | 0   | 1     | 1   | 0   | 1   | 0   | 0   |
| <i>Sonchus oleraceus</i>      | 8     | 0.6  | 2   | 3     | 0   | 0   | 0   | 3   | 0   |
| <i>Stellaria media</i>        | 11    | 0.9  | 0   | 2     | 0   | 2   | 2   | 4   | 1   |
| <i>Taraxacum spp.</i>         | 2     | 0.2  | 0   | 0     | 0   | 0   | 2   | 0   | 0   |
| <i>Urtica dioica/urens</i>    | 140   | 11.1 | 55  | 41    | 22  | 13  | 5   | 3   | 1   |
| <i>Veronica agrestis</i>      | 2     | 0.2  | 0   | 0     | 1   | 0   | 1   | 0   | 0   |
| <i>Veronica hederifolia</i>   | 3     | 0.2  | 0   | 0     | 1   | 0   | 0   | 2   | 0   |
| <i>Veronica persica</i>       | 18    | 1.4  | 10  | 5     | 1   | 1   | 1   | 0   | 0   |
| <i>Viola arvensis</i>         | 13    | 1    | 4   | 3     | 2   | 0   | 1   | 2   | 1   |

**Table S3:** Species list of sampling scheme II, field position, with total number of seedlings per transect (sampled area 0.01 m<sup>2</sup>) and number of transects.

| Species                        | Seed bank           |            |              |                     |            |              | Vegetation     |            |              |
|--------------------------------|---------------------|------------|--------------|---------------------|------------|--------------|----------------|------------|--------------|
|                                | Field interior      | Field edge | Flower strip | Field interior      | Field edge | Flower strip | Field interior | Field edge | Flower strip |
|                                | Number of Seedlings |            |              | Number of Transects |            |              |                |            |              |
| <i>Acer campestre</i>          | 0                   | 0          | 0            | 0                   | 0          | 0            | 1              | 0          | 0            |
| <i>Achillea millefolium</i>    | 0                   | 3          | 97           | 0                   | 3          | 7            | 0              | 1          | 9            |
| <i>Achillea ptarmica</i>       | 0                   | 0          | 1            | 0                   | 0          | 1            | 0              | 0          | 3            |
| <i>Aegopodium podagraria</i>   | 0                   | 0          | 0            | 0                   | 0          | 0            | 0              | 0          | 1            |
| <i>Aethusa cynapium</i>        | 3                   | 0          | 0            | 1                   | 0          | 0            | 0              | 0          | 0            |
| <i>Alnus glutinosa</i>         | 0                   | 0          | 0            | 0                   | 0          | 0            | 0              | 0          | 1            |
| <i>Alopecurus myosuroides</i>  | 2                   | 47         | 4            | 1                   | 5          | 1            | 1              | 3          | 4            |
| <i>Alopecurus pratensis</i>    | 0                   | 0          | 0            | 0                   | 0          | 0            | 0              | 0          | 1            |
| <i>Amaranthus spp.</i>         | 0                   | 3          | 35           | 0                   | 3          | 4            | 0              | 0          | 1            |
| <i>Anagallis arvensis</i>      | 4                   | 4          | 15           | 4                   | 2          | 3            | 0              | 0          | 0            |
| <i>Anethum graveolens</i>      | 0                   | 0          | 0            | 0                   | 0          | 0            | 0              | 0          | 3            |
| <i>Anthemis arvensis</i>       | 0                   | 0          | 0            | 0                   | 0          | 0            | 0              | 0          | 3            |
| <i>Anthemis tinctoria</i>      | 0                   | 0          | 5            | 0                   | 0          | 1            | 0              | 0          | 3            |
| <i>Anthoxanthum odoratum</i>   | 0                   | 0          | 1            | 0                   | 0          | 1            | 0              | 0          | 0            |
| <i>Anthriscus caucalis</i>     | 0                   | 0          | 0            | 0                   | 0          | 0            | 1              | 0          | 0            |
| <i>Anthriscus sylvestris</i>   | 0                   | 0          | 0            | 0                   | 0          | 0            | 0              | 0          | 1            |
| <i>Apera spica-venti</i>       | 12                  | 61         | 42           | 3                   | 4          | 6            | 1              | 2          | 2            |
| <i>Aphanes arvensis</i>        | 0                   | 0          | 0            | 0                   | 0          | 0            | 0              | 1          | 0            |
| <i>Arabidopsis thaliana</i>    | 4                   | 13         | 11           | 1                   | 3          | 4            | 0              | 0          | 0            |
| <i>Arctium lappa</i>           | 0                   | 0          | 0            | 0                   | 0          | 0            | 0              | 2          | 2            |
| <i>Arenaria serpyllifolia</i>  | 2                   | 16         | 10           | 1                   | 1          | 2            | 0              | 0          | 0            |
| <i>Arrhenatherum elatius</i>   | 0                   | 0          | 0            | 0                   | 0          | 0            | 0              | 4          | 3            |
| <i>Artemisia vulgaris</i>      | 13                  | 28         | 59           | 4                   | 5          | 6            | 1              | 2          | 8            |
| <i>Atriplex patula</i>         | 0                   | 0          | 6            | 0                   | 0          | 3            | 0              | 0          | 0            |
| <i>Avena sativa</i>            | 0                   | 0          | 0            | 0                   | 0          | 0            | 1              | 0          | 0            |
| <i>Betula spp.</i>             | 9                   | 12         | 37           | 6                   | 7          | 5            | 0              | 0          | 0            |
| <i>Borago officinalis</i>      | 0                   | 1          | 4            | 0                   | 1          | 2            | 0              | 0          | 6            |
| <i>Brassica napus</i>          | 9                   | 0          | 6            | 3                   | 0          | 5            | 0              | 0          | 3            |
| <i>Brassica nigra</i>          | 0                   | 1          | 6            | 0                   | 1          | 2            | 0              | 0          | 1            |
| <i>Brassica oleracea</i>       | 0                   | 0          | 0            | 0                   | 0          | 0            | 1              | 0          | 6            |
| <i>Brassica rapa</i>           | 0                   | 0          | 0            | 0                   | 0          | 0            | 1              | 0          | 0            |
| <i>Brassica spp.</i>           | 0                   | 0          | 0            | 0                   | 0          | 0            | 0              | 0          | 1            |
| <i>Bromus hordeaceus</i>       | 0                   | 0          | 0            | 0                   | 0          | 0            | 0              | 1          | 1            |
| <i>Bromus sterilis</i>         | 0                   | 0          | 0            | 0                   | 0          | 0            | 0              | 8          | 8            |
| <i>Calendula officinalis</i>   | 1                   | 0          | 1            | 1                   | 0          | 1            | 0              | 0          | 2            |
| <i>Campanula spp.</i>          | 0                   | 0          | 0            | 0                   | 0          | 0            | 0              | 0          | 1            |
| <i>Capsella bursa-pastoris</i> | 56                  | 50         | 171          | 9                   | 12         | 15           | 0              | 1          | 7            |
| <i>Cardamine hirsuta</i>       | 0                   | 1          | 17           | 0                   | 1          | 2            | 0              | 0          | 0            |
| <i>Carduus acanthoides</i>     | 0                   | 0          | 0            | 0                   | 0          | 0            | 0              | 0          | 1            |
| <i>Centaurea cyanus</i>        | 1                   | 0          | 11           | 1                   | 0          | 3            | 0              | 3          | 9            |

To be continued on next page

|                                | Seed bank           |            |              | Vegetation          |            |              |
|--------------------------------|---------------------|------------|--------------|---------------------|------------|--------------|
|                                | Field interior      | Field edge | Flower strip | Field interior      | Field edge | Flower strip |
|                                | Number of Seedlings |            |              | Number of Transects |            |              |
| <i>Centaurea jacea</i>         | 0                   | 0          | 0            | 0                   | 0          | 5            |
| <i>Centaurea nigra</i>         | 0                   | 0          | 0            | 0                   | 0          | 2            |
| <i>Cerastium arvense</i>       | 0                   | 0          | 0            | 0                   | 0          | 1            |
| <i>Cerastium holosteoides</i>  | 0                   | 3          | 25           | 0                   | 3          | 2            |
| <i>Chaerophyllum bulbosum</i>  | 0                   | 0          | 0            | 0                   | 0          | 0            |
| <i>"Chamomilla"</i>            | 226                 | 293        | 1054         | 9                   | 15         | 15           |
| <i>Chenopodium album</i>       | 313                 | 301        | 1295         | 12                  | 20         | 20           |
| <i>Chenopodium ficifolium</i>  | 0                   | 2          | 0            | 0                   | 2          | 0            |
| <i>Chenopodium hybridum</i>    | 4                   | 5          | 10           | 1                   | 2          | 2            |
| <i>Chenopodium polyspermum</i> | 2                   | 41         | 208          | 2                   | 4          | 4            |
| <i>Cichorium intybus</i>       | 0                   | 0          | 0            | 0                   | 0          | 0            |
| <i>Cirsium arvense</i>         | 0                   | 0          | 0            | 0                   | 0          | 3            |
| <i>Cirsium vulgare</i>         | 0                   | 1          | 1            | 0                   | 1          | 0            |
| <i>Clinopodium vulgare</i>     | 0                   | 0          | 0            | 0                   | 0          | 0            |
| <i>Conium maculatum</i>        | 0                   | 0          | 0            | 0                   | 0          | 0            |
| <i>Consolida regalis</i>       | 0                   | 0          | 0            | 0                   | 0          | 0            |
| <i>Convolvulus arvensis</i>    | 0                   | 0          | 0            | 0                   | 0          | 1            |
| <i>Conyza canadensis</i>       | 11                  | 57         | 45           | 1                   | 6          | 4            |
| <i>Coriandrum sativum</i>      | 0                   | 0          | 0            | 0                   | 0          | 0            |
| <i>Crataegus spp.</i>          | 0                   | 0          | 0            | 0                   | 0          | 0            |
| <i>Crepis biennis</i>          | 0                   | 0          | 0            | 0                   | 0          | 1            |
| <i>Dactylis glomerata</i>      | 1                   | 19         | 8            | 1                   | 2          | 2            |
| <i>Daucus carota</i>           | 0                   | 0          | 145          | 0                   | 0          | 8            |
| <i>Deschampsia cespitosa</i>   | 0                   | 1          | 2            | 0                   | 1          | 2            |
| <i>Descurainia sophia</i>      | 89                  | 112        | 69           | 6                   | 8          | 7            |
| <i>Digitaria ischaemum</i>     | 1                   | 0          | 0            | 1                   | 0          | 0            |
| <i>Dipsacus fullonum</i>       | 0                   | 0          | 0            | 0                   | 0          | 0            |
| <i>Draba verna</i>             | 0                   | 0          | 0            | 0                   | 0          | 0            |
| <i>Echinochloa crus-galli</i>  | 49                  | 64         | 149          | 3                   | 6          | 5            |
| <i>Echium vulgare</i>          | 0                   | 0          | 0            | 0                   | 0          | 0            |
| <i>Elymus repens</i>           | 0                   | 0          | 3            | 0                   | 0          | 2            |
| <i>Epilobium ciliatum</i>      | 1                   | 23         | 3            | 1                   | 3          | 3            |
| <i>Equisetum arvense</i>       | 0                   | 0          | 0            | 0                   | 0          | 0            |
| <i>Erigeron annuus</i>         | 1                   | 0          | 0            | 1                   | 0          | 0            |
| <i>Erodium cicutarium</i>      | 0                   | 0          | 0            | 0                   | 0          | 0            |
| <i>Erysimum cheiranthoides</i> | 0                   | 0          | 0            | 0                   | 0          | 0            |
| <i>Euphorbia spp.</i>          | 0                   | 2          | 0            | 0                   | 2          | 0            |
| <i>Fagopyrum esculentum</i>    | 0                   | 0          | 0            | 0                   | 0          | 0            |
| <i>Falcaria vulgaris</i>       | 0                   | 0          | 0            | 0                   | 0          | 0            |
| <i>Fallopia convolvulus</i>    | 6                   | 4          | 47           | 4                   | 3          | 4            |
| <i>Festuca arundinacea</i>     | 0                   | 0          | 0            | 0                   | 0          | 0            |
| <i>Festuca pratensis</i>       | 0                   | 0          | 0            | 0                   | 0          | 0            |
| <i>Festuca rubra agg.</i>      | 0                   | 0          | 0            | 0                   | 0          | 0            |

To be continued on next page

|                                    | Seed bank           |            |              | Vegetation          |            |              |
|------------------------------------|---------------------|------------|--------------|---------------------|------------|--------------|
|                                    | Field interior      | Field edge | Flower strip | Field interior      | Field edge | Flower strip |
|                                    | Number of Seedlings |            |              | Number of Transects |            |              |
| <i>Foeniculum vulgare</i>          | 0                   | 0          | 1            | 0                   | 0          | 1            |
| <i>Fragaria moschata</i>           | 0                   | 0          | 1            | 0                   | 0          | 1            |
| <i>Fumaria officinalis</i>         | 0                   | 0          | 0            | 0                   | 0          | 0            |
| <i>Galeopsis tetrahit</i>          | 0                   | 0          | 0            | 0                   | 0          | 0            |
| <i>Galinsoga ciliata</i>           | 0                   | 1          | 1            | 0                   | 1          | 1            |
| <i>Galinsoga parviflora</i>        | 0                   | 0          | 10           | 0                   | 0          | 3            |
| <i>Galium aparine</i>              | 2                   | 4          | 3            | 2                   | 4          | 3            |
| <i>Galium mollugo</i> agg.         | 0                   | 0          | 0            | 0                   | 0          | 0            |
| <i>Galium verum</i>                | 0                   | 0          | 0            | 0                   | 0          | 0            |
| <i>Geranium columbinum</i>         | 0                   | 0          | 0            | 0                   | 0          | 0            |
| <i>Geranium dissectum/pusillum</i> | 1                   | 168        | 38           | 1                   | 10         | 6            |
| <i>Geum rivale</i>                 | 0                   | 0          | 1            | 0                   | 0          | 1            |
| <i>Geum urbanum</i>                | 0                   | 0          | 0            | 0                   | 0          | 0            |
| <i>Glechoma hederaceae</i>         | 3                   | 6          | 1            | 2                   | 3          | 1            |
| <i>Glyceria fluitans</i>           | 0                   | 0          | 0            | 0                   | 0          | 0            |
| <i>Gnaphalium uliginosum</i>       | 2                   | 2          | 20           | 1                   | 1          | 3            |
| <i>Grasses unidentified</i>        | 28                  | 68         | 62           | 7                   | 8          | 14           |
| <i>Guizotia abyssinica</i>         | 0                   | 0          | 0            | 0                   | 0          | 0            |
| <i>Helianthus annuus</i>           | 0                   | 0          | 0            | 0                   | 0          | 0            |
| <i>Heracleum sphondylium</i>       | 0                   | 0          | 0            | 0                   | 0          | 0            |
| <i>Hieracium</i> spp.              | 0                   | 0          | 4            | 0                   | 0          | 2            |
| <i>Holcus lanatus</i>              | 0                   | 1          | 6            | 0                   | 1          | 3            |
| <i>Hordeum vulgare</i>             | 0                   | 0          | 0            | 0                   | 0          | 0            |
| <i>Humulus lupulus</i>             | 0                   | 0          | 0            | 0                   | 0          | 0            |
| <i>Hypericum perforatum</i>        | 0                   | 0          | 1            | 0                   | 0          | 1            |
| <i>Hypochaeris radicata</i>        | 0                   | 0          | 0            | 0                   | 0          | 0            |
| <i>Juncus</i> spp.                 | 29                  | 57         | 59           | 10                  | 12         | 16           |
| <i>Knautia arvensis</i>            | 0                   | 0          | 0            | 0                   | 0          | 0            |
| <i>Weeds unidentified</i>          | 0                   | 3          | 5            | 0                   | 2          | 2            |
| <i>Lactuca seriola</i>             | 0                   | 12         | 1            | 0                   | 2          | 1            |
| <i>Lamium purpureum</i>            | 1                   | 12         | 13           | 1                   | 4          | 7            |
| <i>Lapsana communis</i>            | 1                   | 10         | 1            | 1                   | 3          | 1            |
| <i>Lathyrus pratensis</i>          | 0                   | 0          | 0            | 0                   | 0          | 0            |
| <i>Leontodon autumnalis</i>        | 0                   | 0          | 1            | 0                   | 0          | 1            |
| <i>Leonurus cardiaca</i>           | 0                   | 0          | 0            | 0                   | 0          | 0            |
| <i>Lepidium sativum</i>            | 0                   | 0          | 0            | 0                   | 0          | 0            |
| <i>Leucanthemum ircutianum</i>     | 0                   | 0          | 31           | 0                   | 0          | 6            |
| <i>Leucanthemum vulgare</i>        | 0                   | 0          | 0            | 0                   | 0          | 0            |
| <i>Linum usitatissimum</i>         | 0                   | 0          | 0            | 0                   | 0          | 0            |
| <i>Lolium multiflorum</i>          | 0                   | 0          | 0            | 0                   | 0          | 0            |
| <i>Lolium perenne</i>              | 3                   | 0          | 8            | 1                   | 0          | 1            |
| <i>Lotus corniculatus</i>          | 0                   | 0          | 11           | 0                   | 0          | 9            |
| <i>Lotus pedunculatus</i>          | 0                   | 0          | 0            | 0                   | 0          | 0            |

To be continued on next page

|                               | Seed bank           |            |              |                     |            |              | Vegetation     |            |              |
|-------------------------------|---------------------|------------|--------------|---------------------|------------|--------------|----------------|------------|--------------|
|                               | Field interior      | Field edge | Flower strip | Field interior      | Field edge | Flower strip | Field interior | Field edge | Flower strip |
|                               | Number of Seedlings |            |              | Number of Transects |            |              |                |            |              |
| <i>Lychnis flos-cuculi</i>    | 0                   | 7          | 40           | 0                   | 1          | 3            | 0              | 0          | 3            |
| <i>Lysimachia vulgaris</i>    | 0                   | 0          | 0            | 0                   | 0          | 0            | 0              | 0          | 1            |
| <i>Malva moschata</i>         | 0                   | 0          | 0            | 0                   | 0          | 0            | 0              | 0          | 5            |
| <i>Malva sylvestris</i>       | 0                   | 14         | 0            | 0                   | 3          | 0            | 0              | 0          | 4            |
| <i>Medicago lupulina</i>      | 1                   | 0          | 18           | 1                   | 0          | 3            | 0              | 0          | 7            |
| <i>Medicago sativa</i>        | 0                   | 0          | 0            | 0                   | 0          | 0            | 0              | 0          | 5            |
| <i>Medicago varia</i>         | 0                   | 0          | 0            | 0                   | 0          | 0            | 0              | 0          | 2            |
| <i>Melilotus albus</i>        | 0                   | 0          | 0            | 0                   | 0          | 0            | 0              | 0          | 2            |
| <i>Melilotus officinalis</i>  | 0                   | 0          | 4            | 0                   | 0          | 2            | 0              | 0          | 4            |
| <i>Mercurialis annua</i>      | 0                   | 0          | 1            | 0                   | 0          | 1            | 1              | 0          | 1            |
| <i>Milium effusum</i>         | 0                   | 1          | 0            | 0                   | 1          | 0            | 0              | 0          | 0            |
| <i>Myosotis arvensis</i>      | 5                   | 8          | 39           | 1                   | 5          | 7            | 0              | 1          | 4            |
| <i>Myosurus minimus</i>       | 0                   | 1          | 36           | 0                   | 1          | 1            | 0              | 0          | 1            |
| <i>Oenothera biennis</i>      | 0                   | 0          | 2            | 0                   | 0          | 1            | 0              | 0          | 0            |
| <i>Onobrychis viciifolia</i>  | 0                   | 0          | 0            | 0                   | 0          | 0            | 0              | 0          | 3            |
| <i>Origanum vulgare</i>       | 0                   | 0          | 0            | 0                   | 0          | 0            | 0              | 0          | 1            |
| <i>Oxalis acetosella</i>      | 0                   | 0          | 0            | 0                   | 0          | 0            | 0              | 0          | 1            |
| <i>Oxalis stricta</i>         | 0                   | 0          | 0            | 0                   | 0          | 0            | 0              | 0          | 1            |
| <i>Papaver spp.</i>           | 41                  | 212        | 77           | 3                   | 7          | 9            | 2              | 5          | 5            |
| <i>Parthenocissus inserta</i> | 0                   | 0          | 0            | 0                   | 0          | 0            | 1              | 0          | 0            |
| <i>Pastinaca sativa</i>       | 0                   | 0          | 0            | 0                   | 0          | 0            | 0              | 0          | 2            |
| <i>Persicaria hydropiper</i>  | 0                   | 0          | 5            | 0                   | 0          | 1            | 0              | 0          | 0            |
| <i>Persicaria maculosa</i>    | 2                   | 0          | 119          | 1                   | 0          | 4            | 1              | 2          | 3            |
| <i>Phacelia tanacetifolia</i> | 0                   | 0          | 64           | 0                   | 0          | 4            | 0              | 0          | 9            |
| <i>Phalaris arundinacea</i>   | 0                   | 0          | 0            | 0                   | 0          | 0            | 0              | 1          | 3            |
| <i>Phaseolus (bean)</i>       | 4                   | 1          | 0            | 2                   | 1          | 0            | 0              | 0          | 0            |
| <i>Phleum pratense</i>        | 0                   | 0          | 0            | 0                   | 0          | 0            | 0              | 0          | 5            |
| <i>Phragmites australis</i>   | 0                   | 0          | 0            | 0                   | 0          | 0            | 0              | 2          | 0            |
| <i>Picris hieracioides</i>    | 0                   | 0          | 0            | 0                   | 0          | 0            | 0              | 0          | 1            |
| <i>Pisum sativum</i>          | 0                   | 0          | 0            | 0                   | 0          | 0            | 0              | 0          | 1            |
| <i>Plantago intermedia</i>    | 6                   | 7          | 13           | 5                   | 4          | 3            | 0              | 0          | 0            |
| <i>Plantago lanceolata</i>    | 0                   | 1          | 44           | 0                   | 1          | 4            | 0              | 0          | 9            |
| <i>Plantago major</i>         | 0                   | 0          | 0            | 0                   | 0          | 0            | 0              | 0          | 6            |
| <i>Poa spp.</i>               | 39                  | 117        | 278          | 6                   | 17         | 11           | 0              | 9          | 13           |
| <i>Polygonum aviculare</i>    | 3                   | 39         | 14           | 2                   | 7          | 11           | 4              | 8          | 5            |
| <i>Populus spec.</i>          | 17                  | 18         | 26           | 9                   | 10         | 12           | 0              | 0          | 0            |
| <i>Potentilla anserina</i>    | 0                   | 0          | 0            | 0                   | 0          | 0            | 0              | 1          | 0            |
| <i>Potentilla reptans</i>     | 0                   | 0          | 0            | 0                   | 0          | 0            | 0              | 1          | 0            |
| <i>Prunella vulgaris</i>      | 0                   | 0          | 1            | 0                   | 0          | 1            | 0              | 0          | 4            |
| <i>Quercus robur</i>          | 0                   | 0          | 0            | 0                   | 0          | 0            | 0              | 0          | 2            |
| <i>Ranunculus repens</i>      | 0                   | 0          | 0            | 0                   | 0          | 0            | 0              | 1          | 1            |
| <i>Ranunculus sceleratus</i>  | 0                   | 0          | 0            | 0                   | 0          | 0            | 0              | 0          | 1            |
| <i>Ranunculus spp.</i>        | 0                   | 0          | 4            | 0                   | 0          | 2            | 0              | 0          | 0            |

To be continued on next page

|                              | Seed bank           |            |              | Vegetation          |            |              |
|------------------------------|---------------------|------------|--------------|---------------------|------------|--------------|
|                              | Field interior      | Field edge | Flower strip | Field interior      | Field edge | Flower strip |
|                              | Number of Seedlings |            |              | Number of Transects |            |              |
| <i>Raphanus sativus</i>      | 0                   | 0          | 0            | 0                   | 0          | 1            |
| <i>Reseda lutea</i>          | 0                   | 0          | 0            | 0                   | 0          | 2            |
| <i>Rumex acetosa</i>         | 0                   | 1          | 0            | 0                   | 0          | 2            |
| <i>Rumex crispus</i>         | 0                   | 7          | 39           | 0                   | 2          | 2            |
| <i>Rumex obtusifolius</i>    | 0                   | 6          | 10           | 0                   | 2          | 8            |
| <i>Rumex spp.</i>            | 0                   | 1          | 1            | 0                   | 1          | 0            |
| <i>Sagina procumbens</i>     | 3                   | 0          | 2            | 3                   | 0          | 0            |
| <i>Salvia pratensis</i>      | 0                   | 0          | 0            | 0                   | 0          | 1            |
| <i>Sanguisorba minor</i>     | 0                   | 0          | 0            | 0                   | 0          | 1            |
| <i>Scropholaria spp.</i>     | 0                   | 0          | 1            | 0                   | 0          | 0            |
| <i>Secale cereale</i>        | 0                   | 0          | 0            | 0                   | 0          | 1            |
| <i>Secale multicaule</i>     | 0                   | 0          | 0            | 0                   | 0          | 2            |
| <i>Senecio sylvaticus</i>    | 0                   | 0          | 1            | 0                   | 0          | 0            |
| <i>Senecio vulgaris</i>      | 0                   | 1          | 0            | 0                   | 1          | 2            |
| <i>Setaria pumila</i>        | 0                   | 0          | 0            | 0                   | 0          | 0            |
| <i>Setaria spp.</i>          | 0                   | 1          | 0            | 0                   | 1          | 0            |
| <i>Silene spp.</i>           | 1                   | 1          | 36           | 1                   | 1          | 14           |
| <i>Sinapis alba</i>          | 0                   | 0          | 0            | 0                   | 0          | 6            |
| <i>Sinapis arvensis</i>      | 3                   | 0          | 7            | 1                   | 0          | 1            |
| <i>Sisymbrium officinale</i> | 34                  | 23         | 57           | 3                   | 4          | 5            |
| <i>Solanum nigrum</i>        | 21                  | 13         | 32           | 3                   | 5          | 0            |
| <i>Solanum tuberosum</i>     | 0                   | 0          | 0            | 0                   | 0          | 0            |
| <i>Sonchus arvensis</i>      | 0                   | 1          | 0            | 0                   | 1          | 1            |
| <i>Sonchus asper</i>         | 2                   | 5          | 6            | 2                   | 3          | 3            |
| <i>Sonchus oleraceus</i>     | 0                   | 0          | 1            | 0                   | 0          | 1            |
| <i>Sonchus spp.</i>          | 0                   | 1          | 2            | 0                   | 1          | 0            |
| <i>Spergula arvensis</i>     | 0                   | 1          | 0            | 0                   | 1          | 0            |
| <i>Stachys spp.</i>          | 0                   | 1          | 0            | 0                   | 1          | 0            |
| <i>Stellaria graminea</i>    | 0                   | 0          | 0            | 0                   | 0          | 1            |
| <i>Stellaria media</i>       | 19                  | 66         | 53           | 6                   | 8          | 6            |
| <i>Tanacetum vulgare</i>     | 0                   | 1          | 26           | 0                   | 1          | 5            |
| <i>Taraxacum spp.</i>        | 0                   | 0          | 4            | 0                   | 0          | 12           |
| <i>Thlaspi arvense</i>       | 1                   | 3          | 270          | 1                   | 2          | 3            |
| <i>Trifolium spp.</i>        | 3                   | 1          | 131          | 2                   | 1          | 17           |
| <i>Triticosecale spp.</i>    | 0                   | 0          | 0            | 0                   | 0          | 1            |
| <i>Triticum aestivum</i>     | 0                   | 0          | 0            | 0                   | 0          | 5            |
| <i>Tussilago farfara</i>     | 0                   | 0          | 0            | 0                   | 0          | 2            |
| <i>Urtica dioica/urens</i>   | 29                  | 271        | 395          | 8                   | 16         | 8            |
| <i>Valerianella spp.</i>     | 2                   | 5          | 2            | 1                   | 3          | 0            |
| <i>Verbascum densiflorum</i> | 0                   | 0          | 0            | 0                   | 0          | 1            |
| <i>Verbascum nigrum</i>      | 0                   | 0          | 3            | 0                   | 0          | 1            |
| <i>Verbascum spp.</i>        | 0                   | 0          | 0            | 0                   | 0          | 1            |
| <i>Veronica agrestis</i>     | 0                   | 0          | 1            | 0                   | 0          | 0            |

To be continued on the next page



|                             | Seed bank           |            |                |                     |            |                | Vegetation     |            |                |
|-----------------------------|---------------------|------------|----------------|---------------------|------------|----------------|----------------|------------|----------------|
|                             | Field interior      | Field edge | Field interior | Field interior      | Field edge | Field interior | Field interior | Field edge | Field interior |
|                             | Number of Seedlings |            |                | Number of Transects |            |                |                |            |                |
| <i>Veronica arvensis</i>    | 31                  | 2          | 6              | 2                   | 2          | 2              | 0              | 0          | 1              |
| <i>Veronica hederifolia</i> | 0                   | 4          | 4              | 0                   | 1          | 2              | 2              | 1          | 0              |
| <i>Veronica persica</i>     | 10                  | 43         | 111            | 2                   | 6          | 9              | 0              | 1          | 2              |
| <i>Vicia angustifolia</i>   | 0                   | 0          | 0              | 0                   | 0          | 0              | 0              | 0          | 2              |
| <i>Vicia cracca</i>         | 0                   | 0          | 0              | 0                   | 0          | 0              | 0              | 3          | 0              |
| <i>Vicia hirsuta</i>        | 0                   | 0          | 0              | 0                   | 0          | 0              | 0              | 1          | 2              |
| <i>Vicia sativa</i>         | 0                   | 0          | 0              | 0                   | 0          | 0              | 0              | 0          | 3              |
| <i>Vicia villosa</i>        | 0                   | 0          | 0              | 0                   | 0          | 0              | 0              | 0          | 2              |
| <i>Viola arvensis</i>       | 37                  | 22         | 102            | 7                   | 7          | 10             | 1              | 3          | 5              |
| <i>Zea mays</i>             | 0                   | 0          | 0              | 0                   | 0          | 0              | 0              | 1          | 0              |

**Table S4:** Results of multilevel pattern analysis, only significant species associations are shown.

| Species                        | stat  | p-value  |
|--------------------------------|-------|----------|
| <i>Lotus corniculatus</i>      | 0.534 | 0.005 ** |
| <i>Daucus carota</i>           | 0.483 | 0.005 ** |
| <i>Chenopodium album</i>       | 0.372 | 0.010 ** |
| <i>Cerastium holosteoides</i>  | 0.364 | 0.015 *  |
| <i>Poa spp.</i>                | 0.358 | 0.030 *  |
| <i>Leucanthemum ircutianum</i> | 0.357 | 0.005 ** |
| <i>Thlaspi arvense</i>         | 0.351 | 0.005 ** |
| <i>Plantago lanceolata</i>     | 0.325 | 0.030 *  |
| <i>Tanacetum vulgare</i>       | 0.301 | 0.020 *  |
| <i>Veronica persica</i>        | 0.299 | 0.050 *  |
| <i>Achillea millefolium</i>    | 0.284 | 0.010 ** |
| <i>Rumex crispus</i>           | 0.281 | 0.025 *  |
| <i>Myosotis arvensis</i>       | 0.267 | 0.040 *  |

**Table S5:** Results of multilevel pattern analysis, only significant species associations are shown.

**Group field edge seed bank**

|                     | stat  | p-value |
|---------------------|-------|---------|
| <i>Papaver spp.</i> | 0.292 | 0.035   |

**Group field edge vegetation**

|                             | stat  | p-value |
|-----------------------------|-------|---------|
| <i>Equisetum arvense</i>    | 0.368 | 0.005   |
| <i>Cirsium arvense</i>      | 0.348 | 0.005   |
| <i>Bromus sterilis</i>      | 0.315 | 0.020   |
| <i>Convolvulus arvensis</i> | 0.239 | 0.030   |

**Group flower strip vegetation**

|                               | stat  | p-value |
|-------------------------------|-------|---------|
| <i>Foeniculum vulgare</i>     | 0.469 | 0.005   |
| <i>Cichorium intybus</i>      | 0.415 | 0.005   |
| <i>Lotus corniculatus</i>     | 0.395 | 0.005   |
| <i>Sinapis alba</i>           | 0.386 | 0.005   |
| <i>Taraxacum spp.</i>         | 0.386 | 0.010   |
| <i>Brassica oleracea</i>      | 0.384 | 0.005   |
| <i>Silene spp.</i>            | 0.322 | 0.015   |
| <i>Borago officinalis</i>     | 0.322 | 0.030   |
| <i>Melilotus officinalis</i>  | 0.313 | 0.025   |
| <i>Galium mollugo agg.</i>    | 0.301 | 0.005   |
| <i>Medicago sativa</i>        | 0.300 | 0.005   |
| <i>Phleum pratense</i>        | 0.299 | 0.010   |
| <i>Prunella vulgaris</i>      | 0.292 | 0.040   |
| <i>Phacelia tanacetifolia</i> | 0.291 | 0.030   |
| <i>Centaurea cyanus</i>       | 0.282 | 0.035   |
| <i>Malva moschata</i>         | 0.276 | 0.010   |
| <i>Centaurea jacea</i>        | 0.267 | 0.005   |
| <i>Linum usitatissimum</i>    | 0.267 | 0.005   |
| <i>Plantago major</i>         | 0.265 | 0.005   |
| <i>Dipsacus fullonum</i>      | 0.210 | 0.030   |
| <i>Phalaris arundinacea</i>   | 0.201 | 0.045   |
| <i>Triticum aestivum</i>      | 0.194 | 0.010   |

**Group flower strip seed bank**

|                                | stat  | p-value |
|--------------------------------|-------|---------|
| <i>Chenopodium album</i>       | 0.486 | 0.005   |
| <i>Viola arvensis</i>          | 0.390 | 0.005   |
| <i>Thlaspi arvense</i>         | 0.369 | 0.005   |
| <i>Cerastium holosteoides</i>  | 0.360 | 0.025   |
| <i>Poa spp.</i>                | 0.349 | 0.020   |
| <i>Chamomilla</i>              | 0.337 | 0.020   |
| <i>Veronica persica</i>        | 0.333 | 0.010   |
| <i>Capsella bursa pastoris</i> | 0.305 | 0.005   |
| <i>Myosotis arvensis</i>       | 0.288 | 0.015   |
| <i>Solanum nigrum</i>          | 0.285 | 0.035   |
| <i>Rumex crispus</i>           | 0.273 | 0.035   |
| <i>Sisymbrium officinale</i>   | 0.268 | 0.040   |

**Group field edge & flower strip seed bank**

|                            | stat  | p-value |
|----------------------------|-------|---------|
| <i>Juncus spp.</i>         | 0.388 | 0.005   |
| <i>Urtica dioica/urens</i> | 0.312 | 0.015   |
| <i>Stellaria media</i>     | 0.303 | 0.005   |
| <i>Lamium purpureum</i>    | 0.288 | 0.030   |
| <i>Descurainia sophia</i>  | 0.266 | 0.045   |

**Group flower strip seed bank & vegetation**

|                                | stat  | p-value |
|--------------------------------|-------|---------|
| <i>Daucus carota</i>           | 0.374 | 0.010   |
| <i>Trifolium spp.</i>          | 0.309 | 0.030   |
| <i>Plantago lanceolata</i>     | 0.308 | 0.035   |
| <i>Achillea millefolium</i>    | 0.278 | 0.025   |
| <i>Leucanthemum ircutianum</i> | 0.266 | 0.050   |
